# Supplementary material
Source: PubMed Central journal article supplement (PMC3153364)

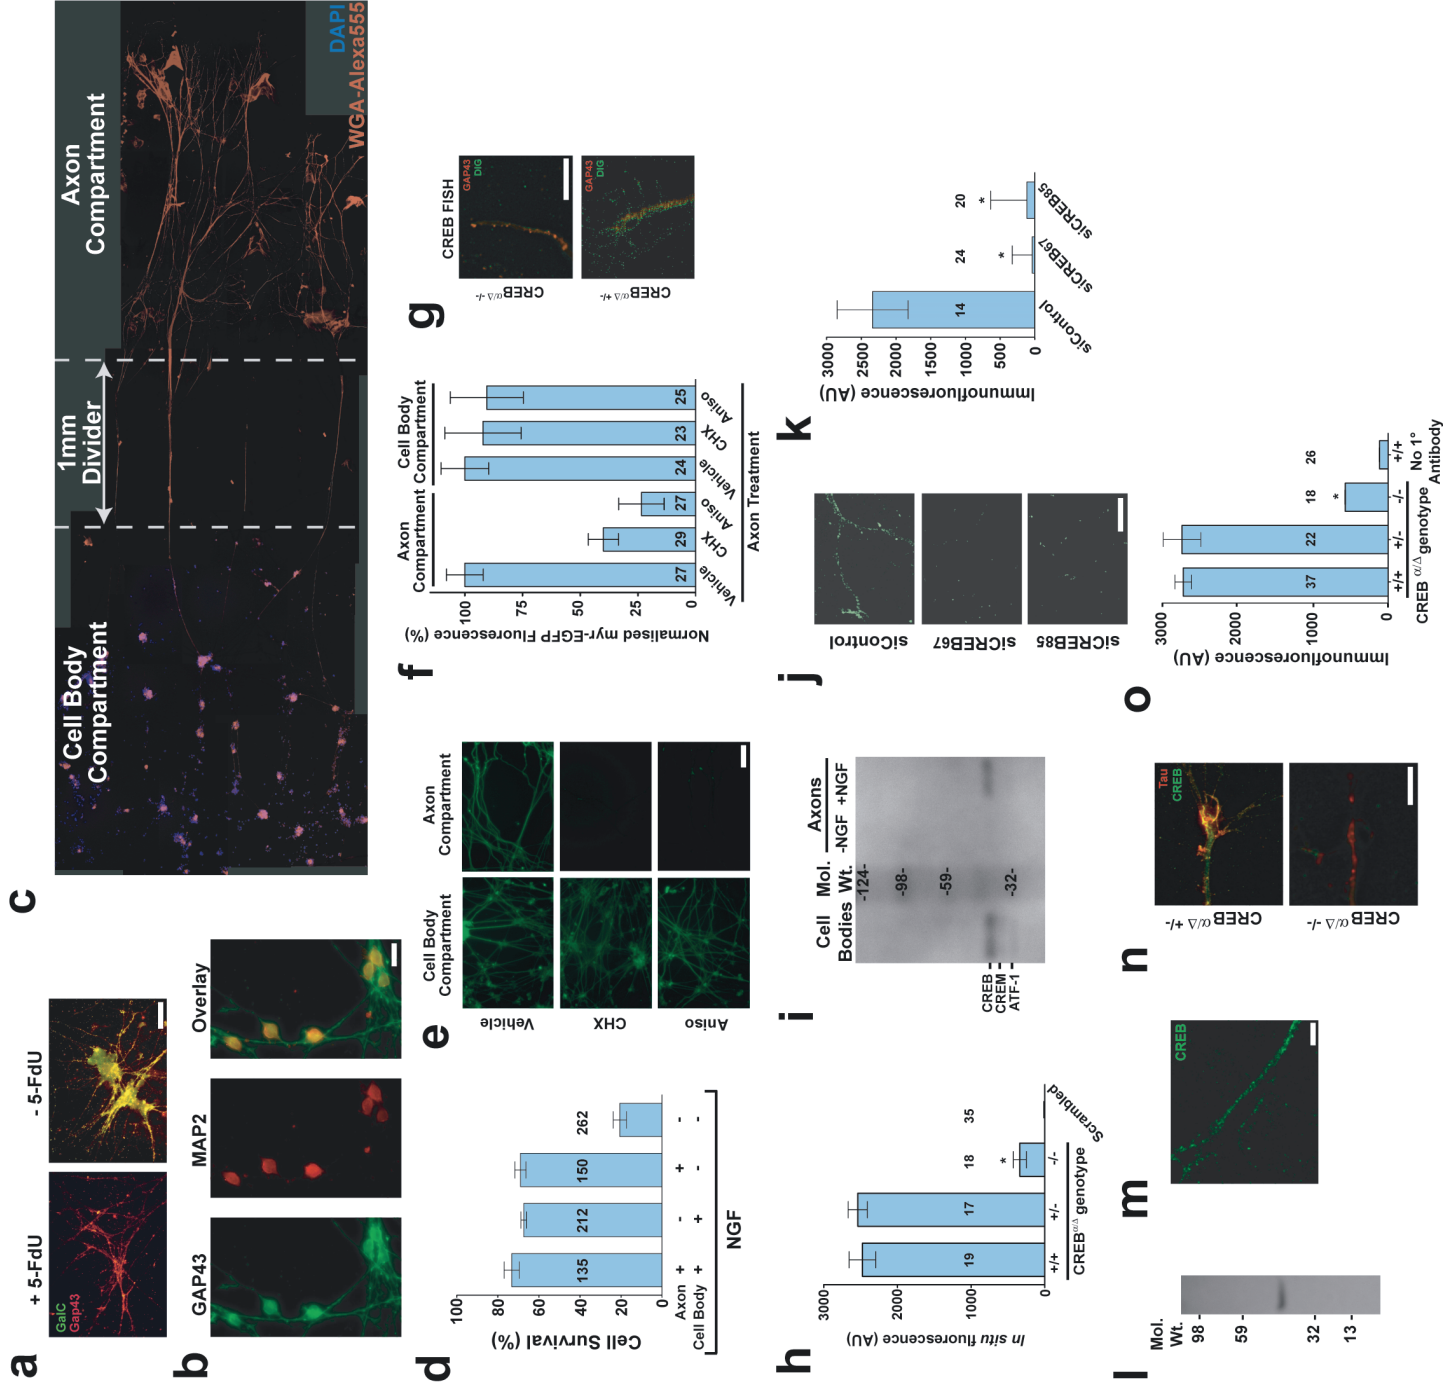

Cox et al. Figure S1

Supplement: NIHMS314467-supplement-Supplementary_Fig_1.pdf [file NIHMS314467-supplement-Supplementary_Fig_1.pdf]

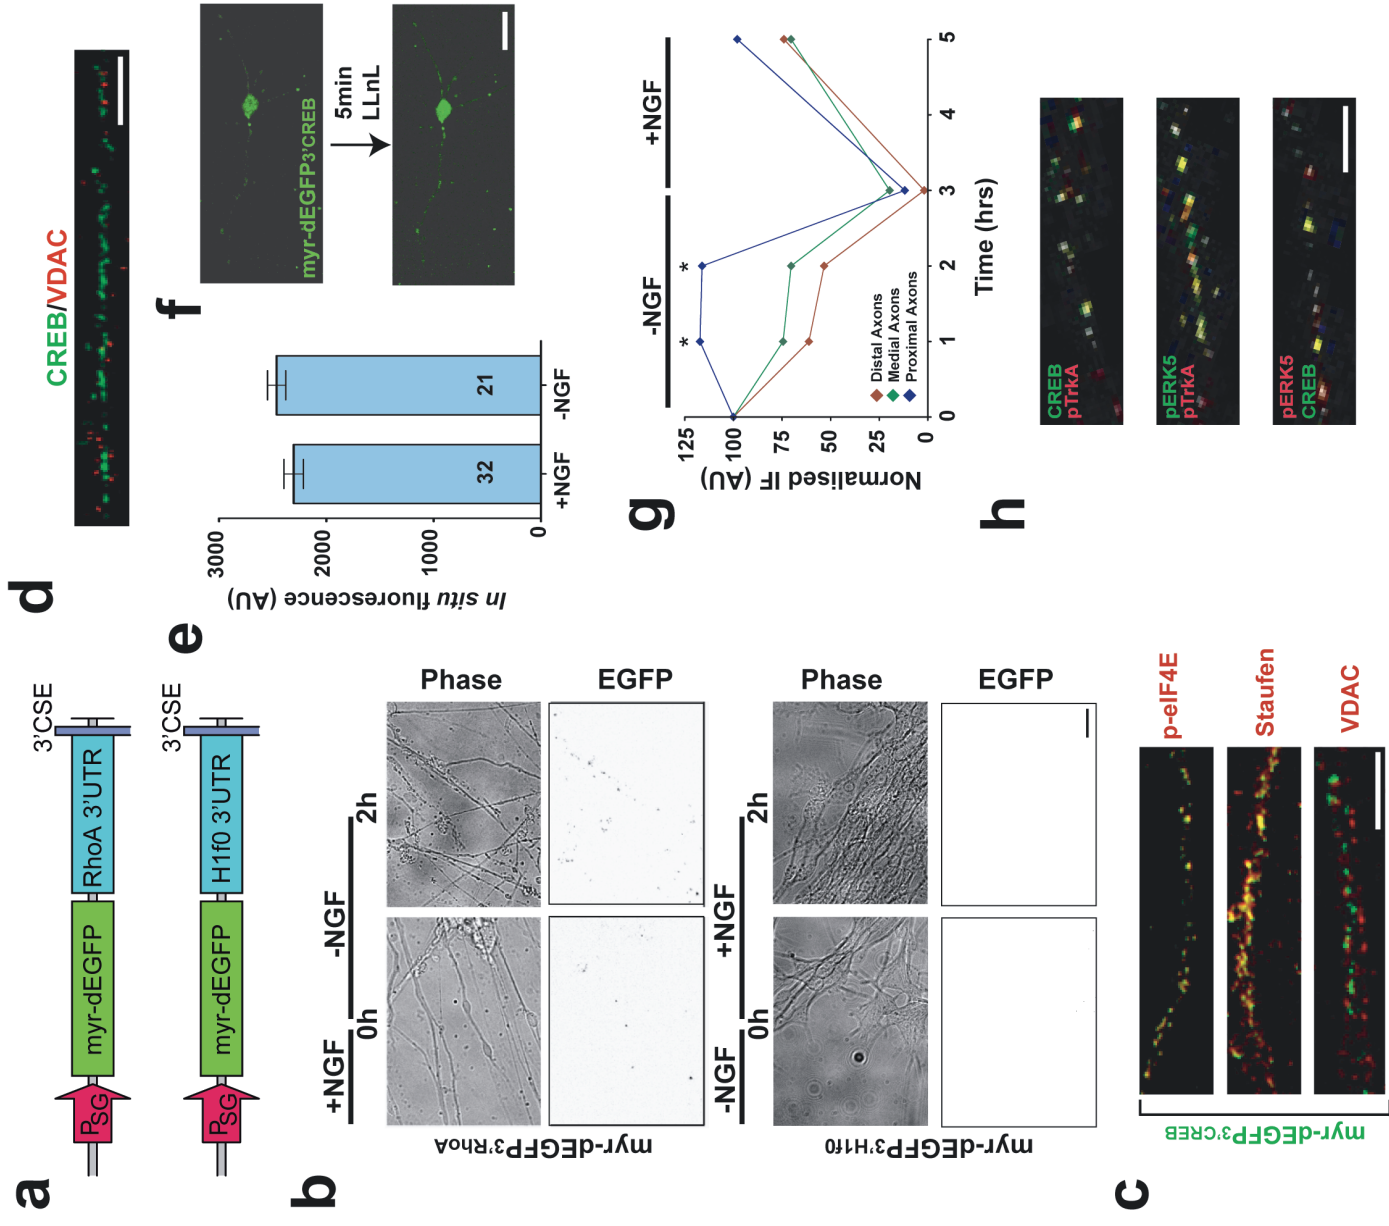

Cox *et al.* Figure S2

Supplement: NIHMS314467-supplement-Supplementary_Fig_2.pdf [file NIHMS314467-supplement-Supplementary_Fig_2.pdf]
